# Supplementary material for: Hydroxyapatite/calcium alginate composite particles for hemostasis and alveolar bone regeneration in tooth extraction wounds
Source: PeerJ journal article supplement (doi:10.7717/peerj.15606), 2023-06-28
Supplement: HemocompatibilityTests.zip [file HemocompatibilityTests.zip]

## Sheet: Sheet3
Method name: Method_ZZJ_CCK8 (Modified)
Application: SparkControl				V3.1 SP1
Device: Spark				Serial number: 2105012786
Firmware:				LUM:V5.2.4|ABS:V4.3.2|ABS_MEX:V5.1.1|MTP:V14.2.11|FLUOR:V5.1.4|FLUOR_FP:V5.0.2|FLUOR_BOTTOM:V5.0.2|FLUOR_MEM:V5.1.1|FLUOR_MEX:V5.1.1|PODI:V1.11.2
Date:				2023-04-24
Time:				17:04
System				DESKTOP-HRCOBIK
User				DESKTOP-HRCOBIK\lenovo
Plate				[GRE96ft] - Greiner 96 Flat Transparent Cat. No.: 655101/655161/655192
Lid lifter				No lid
Humidity Cassette				No humidity cassette
Smooth mode				Not selected
List of actions in this measurement script:
Plate
	Shaking
	Absorbance					Label 1
Name				GRE96ft
Plate layout
Plate area				B3-G6
Start Time				2023-04-24 17:04:28
Shaking (Linear) Duration [s]				5
Shaking (Linear) Position				Current
Shaking (Linear) Amplitude [mm]				1
Shaking (Linear) Frequency [rpm]				1440
End Time				2023-04-24 17:04:33
Mode	Absorbance
Name	Label 1
Measurement wavelength [nm]				540
Number of flashes				10
Settle time [ms]				50
Part of Plate				B3-G6
Start Time				2023-04-24 17:04:33
Temperature [°C]				26.1
<>	1	2	3	4	5	6	7	8	9	10	11	12
A			negative	sample 1	sample 2	positive
B			0.0685	0.0841	0.0846	1.0666
C			0.0741	0.0924	0.08	1.0745
D			0.0748	0.0872	0.0809	1.0658
E			0.0768	0.1003	0.0859	1.0644
F			0.0787	0.0848	0.0994	1.0727
G			0.0799	0.0854	0.1016	1.2116
H
End Time				2023-04-24 17:04:41
			0.0754667			1.0926
			0.0754667			1.0926
			0.0754667			1.0926
			0.0754667			1.0926
			0.0754667			1.0926
			0.0754667			1.0926
					CA	nCA	Negative control	Positive control
			1.01713		0.848791	0.897948	-9.23145	97.4438
			1.01713		1.66481	0.445697	-1.81095	98.2205
			1.01713		1.15357	0.534181	-0.883392	97.3651
			1.01713		2.4415	1.02576	1.76678	97.2275
			1.01713		0.917612	2.35302	4.28445	98.0435
			1.01713		0.976601	2.56931	5.87456	111.7
